# Supplementary material for: Deletion of a pseudogene within a fragile site triggers the oncogenic expression of the mitotic CCSER1 gene
Source: Life Sci Alliance. 2021 Jun 29;4(8):e202101019. doi: 10.26508/lsa.202101019 (PMC8321653; doi:10.26508/lsa.202101019)
Supplement: Supplementary file 1 [file LSA-2021-01019_TableS1.xlsx]

## Sheet: Final_annotation_purity.fragile
s_chrom	s_start	s_end	s_name	g_chrom	g_start	g_end	ensID	symbol	strand	protein_coding	tss_del	rlm_coef	rlm_p	rlm_fdr	rlm_bonf
chr2	140554646	141918549	chr2:140554646:141918549	chr2	140898423	140899106	ENSG00000238065.1	AC010740.1	+	processed_pseudogene	TRUE	3.3978e+10	0.9514939715361159	1.0	1.0
chr2	140554646	141918549	chr2:140554646:141918549	chr2	140992543	140992659	ENSG00000201892.1	Y_RNA	+	misc_RNA	TRUE	-0.0011592965381912422	0.003768337435195365	0.005928850898040708	0.8893276347061062
chr2	140554646	141918549	chr2:140554646:141918549	chr2	141638844	141638963	ENSG00000265224.1	AC012353.1	+	miRNA	TRUE	1.35267e+11	0.8354665186473382	0.9128245296332029	1.0
chr2	140554646	141918549	chr2:140554646:141918549	chr2	140683360	140683888	ENSG00000236440.1	AC117947.1	-	processed_pseudogene	TRUE	0.001216751030937982	0.0006405205916849582	0.0010720770187067387	0.15116285963765014
chr2	140554646	141918549	chr2:140554646:141918549	chr2	141167257	141167357	ENSG00000252015.1	RNU6-904P	-	snRNA	TRUE	-0.0017184635748503745	1.97629e+10	3.88671e+11	0.004664046128888908
chr2	140554646	141918549	chr2:140554646:141918549	chr2	141208082	141208376	ENSG00000233329.1	AC068287.1	-	processed_pseudogene	TRUE	-0.0003741360271629321	0.031096067368821343	0.04420886686169781	1.0
chr2	140554646	141918549	chr2:140554646:141918549	chr2	141606680	141606810	ENSG00000281341.1	AC093859.1	-	miRNA	TRUE	7.55761e+10	0.26124892010053935	0.32621558277104384	1.0
chr2	140554646	141918549	chr2:140554646:141918549	chr2	140231423	142131701	ENSG00000168702.15	LRP1B	-	protein_coding	FALSE	-0.004433288449494278	0.4898497579503035	0.5722997172092654	1.0
chr3	60175388	61288887	chr3:60175388:61288887	chr3	60616822	60618079	ENSG00000240097.1	RP11-641C17.4	+	processed_pseudogene	TRUE	-1.12829e+11	0.9816255467921149	1.0	1.0
chr3	60175388	61288887	chr3:60175388:61288887	chr3	60617805	60617870	ENSG00000281426.1	MIR548BB	-	miRNA	TRUE	0.0	1.0	1.0	1.0
chr3	60175388	61288887	chr3:60175388:61288887	chr3	60690225	60690719	ENSG00000232407.3	RP11-641C17.2	-	processed_pseudogene	TRUE	0.01130947563752272	2.9946e+11	5.79283e+09	0.007067257335301472
chr3	60175388	61288887	chr3:60175388:61288887	chr3	60730055	60730644	ENSG00000225673.3	RP11-641C17.3	-	processed_pseudogene	TRUE	0.0038727103631054412	6.88184e+08	1.59227e+09	0.00016241138321297085
chr3	60175388	61288887	chr3:60175388:61288887	chr3	60732144	60732636	ENSG00000244183.1	RP11-641C17.1	-	processed_pseudogene	TRUE	0.00929770794483186	0.010606795571734327	0.016046177916213468	1.0
chr3	60175388	61288887	chr3:60175388:61288887	chr3	60856389	60856605	ENSG00000212211.2	U3	-	snoRNA	TRUE	0.006215842430313458	1.17062e+06	354188	2.76267e+08
chr3	60175388	61288887	chr3:60175388:61288887	chr3	59749310	61251459	ENSG00000189283.8	FHIT	-	protein_coding	TRUE	-0.17766727178472821	5.78808	23.9647	13659.9
chr3	61645228	62273127	chr3:61645228:62273127	chr3	61561569	62297613	ENSG00000144724.17	PTPRG	+	protein_coding	FALSE	-0.19880017390356955	7.44568e-38	1.03364e-35	1.75718e-34
chr3	61645228	62273127	chr3:61645228:62273127	chr3	61739127	61739229	ENSG00000252420.1	Y_RNA	-	misc_RNA	TRUE	-0.0036628674228003943	6.75695e+07	1.69642e+09	1.59464e+11
chr3	61645228	62273127	chr3:61645228:62273127	chr3	61742455	61743106	ENSG00000226360.5	RPL10AP6	-	processed_pseudogene	TRUE	-0.049045197577900754	7.29132e+10	0.0001365675350072633	0.017207509410915176
chr3	61645228	62273127	chr3:61645228:62273127	chr3	62118300	62118510	ENSG00000252184.1	RNU2-10P	-	snRNA	TRUE	-0.00027307028877163197	0.636568228676563	0.7188043156347793	1.0
chr3	61645228	62273127	chr3:61645228:62273127	chr3	62124204	62124608	ENSG00000237456.3	RP11-154D3.1	-	processed_pseudogene	TRUE	-0.0043578038639447035	0.19196068322297732	0.24755585377389425	1.0
chr3	61645228	62273127	chr3:61645228:62273127	chr3	62260865	62369330	ENSG00000241472.5	PTPRG-AS1	-	processed_transcript	FALSE	0.05625409255065476	0.006660104984767489	0.010273103113759001	1.0
chr4	88577210	88616118	chr4:88577210:88616118	chr4	88521048	88708542	ENSG00000138641.14	HERC3	+	protein_coding	FALSE	-0.19988686139870038	1.47583e-54	3.16633e-53	3.48297e-53
chr4	88577210	88616118	chr4:88577210:88616118	chr4	88583666	88583972	ENSG00000252322.1	RN7SKP244	-	misc_RNA	TRUE	-0.004995969304705038	1.22255e-19	9.30713e-21	2.88521e-18
chr4	90159447	92285420	chr4:90159447:92285420	chr4	90370123	90370427	ENSG00000252087.1	RN7SKP248	+	misc_RNA	TRUE	0.006924506085935921	3534.66	122058	834179
chr4	90159447	92285420	chr4:90159447:92285420	chr4	90682996	90683123	ENSG00000251401.2	RP11-11N6.1	+	processed_pseudogene	TRUE	-0.0020654232483764425	400193	1.25927e+06	9.44455e+06
chr4	90159447	92285420	chr4:90159447:92285420	chr4	91603275	91605292	ENSG00000279013.1	RP11-254A24.2	+	TEC	TRUE	0.013977912818682523	0.149850219209005	0.19756788677835294	1.0
chr4	90159447	92285420	chr4:90159447:92285420	chr4	91887886	91904335	ENSG00000249052.1	RP11-354O24.1	+	lincRNA	TRUE	0.00041010315038766016	1.63434e-12	9.88984e-12	3.85704e-10
chr4	90159447	92285420	chr4:90159447:92285420	chr4	90127535	91601913	ENSG00000184305.13	CCSER1	+	protein_coding	FALSE	0.19848848178787762	1.44976e+10	3.22778e+10	0.0003421441560596929
chr4	90159447	92285420	chr4:90159447:92285420	chr4	90838903	90839037	ENSG00000187653.11	TMSB4XP8	-	processed_pseudogene	TRUE	-0.009549017449684451	0.27441831088029434	0.34085642825131296	1.0
chr4	90159447	92285420	chr4:90159447:92285420	chr4	91885046	91885254	ENSG00000249891.2	KRT19P6	-	processed_pseudogene	TRUE	0.0	1.0	1.0	1.0
chr4	90159447	92285420	chr4:90159447:92285420	chr4	92182477	92184052	ENSG00000248817.1	PMPCAP1	-	processed_pseudogene	TRUE	0.01628814621420023	1.9611e-21	1.54273e-20	4.62819e-20
chr4	90159447	92285420	chr4:90159447:92285420	chr4	92260367	92260751	ENSG00000280056.1	RP11-562F9.3	-	TEC	TRUE	5.40723e+11	9.65318e-51	1.75242e-48	2.27815e-48
chr4	90159447	92285420	chr4:90159447:92285420	chr4	91108023	91112790	ENSG00000248984.1	AC004054.1	-	antisense	TRUE	0.001263009098404134	0.0074573302502339255	0.01142811648737147	1.0
chr4	90159447	92285420	chr4:90159447:92285420	chr4	91319034	91325306	ENSG00000249049.1	RP11-763F8.1	-	antisense	TRUE	0.01241886422319758	3000.06	11238.3	70801.5
chr4	90159447	92285420	chr4:90159447:92285420	chr4	92268767	92277075	ENSG00000249152.1	RP11-562F9.2	-	lincRNA	TRUE	0.00017683214193031334	2.19799e+10	4.84791e+09	0.0005187265952622083
chr4	92524539	93126465	chr4:92524539:93126465	chr4	92702345	92702659	ENSG00000251449.2	MTND1P19	+	processed_pseudogene	TRUE	-0.0006381016247642013	0.0009711180972951193	0.0015697525408332066	0.22918387096164816
chr4	92524539	93126465	chr4:92524539:93126465	chr4	92884663	92885107	ENSG00000248750.2	RP11-131K17.1	+	processed_pseudogene	TRUE	2.6805e+09	0.9623144964603204	1.0	1.0
chr4	92524539	93126465	chr4:92524539:93126465	chr4	92303622	93774556	ENSG00000152208.10	GRID2	+	protein_coding	FALSE	-0.0024994898630267197	0.04048313583877773	0.05686916701161634	1.0
chr4	92524539	93126465	chr4:92524539:93126465	chr4	92821986	92822918	ENSG00000249239.2	RP11-428L21.2	-	processed_pseudogene	TRUE	0.0013045982664569974	0.531286312170703	0.611627169133102	1.0
chr4	92524539	93126465	chr4:92524539:93126465	chr4	92833685	92838842	ENSG00000248627.1	RP11-428L21.1	-	antisense	TRUE	-0.0003986243754969605	4.39489e-10	2.52974e-09	1.03719e-07
chr4	93576702	93582597	chr4:93576702:93582597	chr4	92303622	93774556	ENSG00000152208.10	GRID2	+	protein_coding	FALSE	-0.0022202863700121057	0.07453283523523187	0.1016748503786978	1.0
chr4	93620090	93766091	chr4:93620090:93766091	chr4	92303622	93774556	ENSG00000152208.10	GRID2	+	protein_coding	FALSE	-0.002049040693831605	0.09957242105239078	0.13428052210493843	1.0
chr5	58993507	59690826	chr5:58993507:59690826	chr5	59314110	59314800	ENSG00000276214.1	CTD-2146O16.1	+	processed_pseudogene	TRUE	0.0005876986079340773	0.042319196913074605	0.05909663000879058	1.0
chr5	58993507	59690826	chr5:58993507:59690826	chr5	59528861	59529251	ENSG00000251306.1	NDUFB4P2	+	processed_pseudogene	TRUE	0.002588677816300492	9.6191e+07	2.3647e+09	2.27011e+11
chr5	58993507	59690826	chr5:58993507:59690826	chr5	59039761	59063503	ENSG00000247345.2	RP11-266N13.2	+	antisense	TRUE	0.03790619914252129	1.16657e-08	6.5198e-09	2.7531e-06
chr5	58993507	59690826	chr5:58993507:59690826	chr5	59200025	59200154	ENSG00000281006.1	Clostridiales-1	-	sRNA	TRUE	-0.0009767857692909586	1.10496e-17	7.66972e-18	2.6077e-15
chr5	58993507	59690826	chr5:58993507:59690826	chr5	58969038	60522120	ENSG00000113448.15	PDE4D	-	protein_coding	FALSE	-0.3720140989520253	2.53997e-27	2.22012e-25	5.99433e-25
chr5	59797548	60475896	chr5:59797548:60475896	chr5	60430738	60431112	ENSG00000280447.1	FKSG52	+	protein_coding	TRUE	-0.008475535383591644	0.2846496482963935	0.35171370155994175	1.0
chr5	59797548	60475896	chr5:59797548:60475896	chr5	60021249	60033020	ENSG00000248935.1	CTD-2254N19.1	+	antisense	TRUE	0.001968567869262701	0.0621443	2.8204	146.661
chr5	59797548	60475896	chr5:59797548:60475896	chr5	60304047	60304151	ENSG00000202017.1	RNU6-806P	-	snRNA	TRUE	-0.00013378560161478054	0.744878681650131	0.8253115909362954	1.0
chr5	59797548	60475896	chr5:59797548:60475896	chr5	60429903	60430276	ENSG00000213896.4	RP11-546M4.1	-	processed_pseudogene	TRUE	3.10802e+11	0.9737630069354387	1.0	1.0
chr5	59797548	60475896	chr5:59797548:60475896	chr5	60459848	60460739	ENSG00000214244.4	SETP21	-	processed_pseudogene	TRUE	0.0032144933265001977	0.22393096979081217	0.28546412833494944	1.0
chr5	59797548	60475896	chr5:59797548:60475896	chr5	58969038	60522120	ENSG00000113448.15	PDE4D	-	protein_coding	FALSE	-0.3782633221780924	1.63195e-27	1.48131e-26	3.8514e-26
chr5	89826914	95432807	chr5:89826914:95432807	chr5	89900664	89904908	ENSG00000214942.4	AC113167.1	+	lincRNA	TRUE	0.0029010521920488806	0.00011443534447812852	0.00020615833051021627	0.02700674129683833
chr5	89826914	95432807	chr5:89826914:95432807	chr5	89944910	89947573	ENSG00000249265.1	AC113167.2	+	lincRNA	TRUE	-0.00035187287078702645	0.6574715499008512	0.7388727894123852	1.0
chr5	89826914	95432807	chr5:89826914:95432807	chr5	90410000	90410669	ENSG00000255647.3	CTD-2373J6.2	+	processed_transcript	TRUE	0.025458908753073266	0.0005356197375701996	0.0009093975400472454	0.1264062580665671
chr5	89826914	95432807	chr5:89826914:95432807	chr5	91223419	91223967	ENSG00000212930.3	RP11-414H23.2	+	lincRNA	TRUE	0.0027488470239128713	1.75407e+08	4.59957e+07	4.13961e+09
chr5	89826914	95432807	chr5:89826914:95432807	chr5	91270727	91270867	ENSG00000199643.1	RNU4-90P	+	snRNA	TRUE	0.003082957256306082	1188.25	459.716	280427
chr5	89826914	95432807	chr5:89826914:95432807	chr5	91354478	91354934	ENSG00000240388.2	CTD-2061E19.1	+	processed_pseudogene	TRUE	0.02419430416515388	0.08886106225503562	0.12052419938039313	1.0
chr5	89826914	95432807	chr5:89826914:95432807	chr5	91355380	91356026	ENSG00000241059.2	CTD-2061E19.6	+	antisense	TRUE	0.0011043548996503832	236018	77361.5	5.57002e+06
chr5	89826914	95432807	chr5:89826914:95432807	chr5	91476382	91477018	ENSG00000251356.1	RAB5CP2	+	processed_pseudogene	TRUE	0.013660993438153893	4.53497e+09	9.64191e+09	0.001070251993112015
chr5	89826914	95432807	chr5:89826914:95432807	chr5	92329230	92332584	ENSG00000248864.1	RP11-348J24.1	+	lincRNA	TRUE	0.009444772250994701	4.87433e-44	7.66895e-42	1.15034e-39
chr5	89826914	95432807	chr5:89826914:95432807	chr5	93267429	93268425	ENSG00000213730.3	POLD2P1	+	processed_pseudogene	TRUE	0.035046801035582484	2184.66	7695.23	515580
chr5	89826914	95432807	chr5:89826914:95432807	chr5	93741640	93743500	ENSG00000272406.1	RP11-185E12.2	+	lincRNA	TRUE	0.0005812596851066827	0.6735972616019468	0.7534073636874855	1.0
chr5	89826914	95432807	chr5:89826914:95432807	chr5	94569540	94570676	ENSG00000251340.1	RP11-461G12.2	+	processed_pseudogene	TRUE	0.012828590774383869	0.0005929699524357638	0.0009995779198202876	0.13994090877484025
chr5	89826914	95432807	chr5:89826914:95432807	chr5	94592771	94594791	ENSG00000232578.4	CTC-303L1.1	+	processed_pseudogene	TRUE	0.011934144539848278	5.63295e+09	1.18694e+11	0.0013293760344211464
chr5	89826914	95432807	chr5:89826914:95432807	chr5	94788789	94793599	ENSG00000249175.1	CTC-484P3.3	+	antisense	TRUE	-4.92187e+08	0.9988453456001839	1.0	1.0
chr5	89826914	95432807	chr5:89826914:95432807	chr5	94979151	94980893	ENSG00000249545.1	CTC-558O19.1	+	antisense	TRUE	-0.0004845534299984846	2.01132e+06	600850	4.74671e+07
chr5	89826914	95432807	chr5:89826914:95432807	chr5	90471748	90514553	ENSG00000113356.9	POLR3G	+	protein_coding	TRUE	-0.038583983247063844	0.3709162869608681	0.442102241024065	1.0
chr5	89826914	95432807	chr5:89826914:95432807	chr5	91380349	91439085	ENSG00000281357.1	ARRDC3-AS1	+	lincRNA	TRUE	0.17820667503167864	1.10259e-28	1.08422e-27	2.60212e-26
chr5	89826914	95432807	chr5:89826914:95432807	chr5	92826255	92844004	ENSG00000248588.1	CTC-458G6.4	+	lincRNA	TRUE	0.0026535989474838935	1.66711e-09	9.83593e-10	3.93437e-07
chr5	89826914	95432807	chr5:89826914:95432807	chr5	93600357	93603598	ENSG00000278905.1	RP11-65F13.3	+	TEC	TRUE	-0.00049398831937277	3.53481e+10	7.65335e+08	0.0008342149432722852
chr5	89826914	95432807	chr5:89826914:95432807	chr5	94567461	94568909	ENSG00000251544.1	MTND5P12	+	processed_pseudogene	TRUE	0.0066642308690328484	0.0004920278649217926	0.000847580847602504	0.11611857612154305
chr5	89826914	95432807	chr5:89826914:95432807	chr5	90529344	91164221	ENSG00000164199.14	GPR98	+	protein_coding	TRUE	-0.3800861250330477	6.28347e+08	1.46822e+10	0.00014828997305887834
chr5	89826914	95432807	chr5:89826914:95432807	chr5	92654848	92679141	ENSG00000249169.1	CTC-529L17.1	+	lincRNA	TRUE	0.0016300234692785255	1.33378e+10	3.02666e+10	0.0003147722219624078
chr5	89826914	95432807	chr5:89826914:95432807	chr5	93583337	93594615	ENSG00000175745.10	NR2F1	+	protein_coding	TRUE	-0.07711250459610887	8.06953e+09	1.64279e+11	0.00190440949389656
chr5	89826914	95432807	chr5:89826914:95432807	chr5	94618347	94739436	ENSG00000133302.11	ANKRD32	+	protein_coding	TRUE	-0.29099889229230314	1.22837e-27	1.15958e-26	2.89896e-25
chr5	89826914	95432807	chr5:89826914:95432807	chr5	95391344	95450454	ENSG00000153347.8	FAM81B	+	protein_coding	TRUE	0.11040246579048878	0.0003571449434393422	0.000619751519497682	0.08428620665168476
chr5	89826914	95432807	chr5:89826914:95432807	chr5	92082597	92479426	ENSG00000250049.4	RP11-348J24.2	+	lincRNA	TRUE	0.013736267308522409	7.73308e-15	5.06946e-14	1.82501e-11
chr5	89826914	95432807	chr5:89826914:95432807	chr5	90016621	90016731	ENSG00000264342.2	MIR3660	-	miRNA	TRUE	0.0038597782406294863	1.92365e+11	3.81497e+10	0.00453980917358838
chr5	89826914	95432807	chr5:89826914:95432807	chr5	90353037	90356609	ENSG00000253321.1	RP11-61G23.2	-	lincRNA	TRUE	0.00011465053894698457	0.4791729437441886	0.562611018525515	1.0
chr5	89826914	95432807	chr5:89826914:95432807	chr5	90388468	90389363	ENSG00000260871.1	CTD-2373J6.1	-	sense_overlapping	TRUE	0.10007118973822918	0.000122646	0.00062923	0.289446
chr5	89826914	95432807	chr5:89826914:95432807	chr5	90860616	90860727	ENSG00000276922.1	AC099512.1	-	miRNA	TRUE	0.0009316849865169622	116.517	466.069	27498
chr5	89826914	95432807	chr5:89826914:95432807	chr5	91030990	91031307	ENSG00000249514.1	CTD-2266L18.1	-	processed_pseudogene	TRUE	-0.0007792741506870307	0.17215364330083438	0.22446552386186142	1.0
chr5	89826914	95432807	chr5:89826914:95432807	chr5	91226475	91227071	ENSG00000251093.1	RP11-414H23.3	-	lincRNA	TRUE	0.005646405024969997	0.0910961	0.398124	214.987
chr5	89826914	95432807	chr5:89826914:95432807	chr5	91280097	91281142	ENSG00000234292.3	RP11-213H15.1	-	lincRNA	TRUE	0.022371569905320098	0.028509441633543988	0.04077714076070534	1.0
chr5	89826914	95432807	chr5:89826914:95432807	chr5	91313057	91314402	ENSG00000271762.1	RP11-213H15.4	-	lincRNA	TRUE	0.0	1.0	1.0	1.0
chr5	89826914	95432807	chr5:89826914:95432807	chr5	91314716	91314997	ENSG00000277001.1	Metazoa_SRP	-	misc_RNA	TRUE	0.0014768516076137533	7.50604e+10	0.00013839269876255643	0.017714265441607223
chr5	89826914	95432807	chr5:89826914:95432807	chr5	91843687	91844529	ENSG00000248826.2	PCBP2P3	-	processed_pseudogene	TRUE	0.002986936050200519	13.3933	57.4693	3160.81
chr5	89826914	95432807	chr5:89826914:95432807	chr5	91844022	91844116	ENSG00000276426.1	uc_338	-	misc_RNA	TRUE	0.0	1.0	1.0	1.0
chr5	89826914	95432807	chr5:89826914:95432807	chr5	92405941	92406044	ENSG00000264489.2	AC120120.1	-	miRNA	TRUE	0.0	1.0	1.0	1.0
chr5	89826914	95432807	chr5:89826914:95432807	chr5	92840807	92841628	ENSG00000248950.1	LDHBP3	-	processed_pseudogene	TRUE	0.00024450807589226697	5.15328e+06	1.43079e+08	1.21617e+10
chr5	89826914	95432807	chr5:89826914:95432807	chr5	92889387	92890840	ENSG00000249958.1	CCT7P2	-	processed_pseudogene	TRUE	-0.001970989661121758	0.05496636897773855	0.07541897138805988	1.0
chr5	89826914	95432807	chr5:89826914:95432807	chr5	93620696	93620788	ENSG00000251725.1	MIR2277	-	miRNA	TRUE	0.0	1.0	1.0	1.0
chr5	89826914	95432807	chr5:89826914:95432807	chr5	93682838	93683667	ENSG00000249353.2	NPM1P27	-	processed_pseudogene	TRUE	-0.08125297161710303	398.902	14483.2	94140.9
chr5	89826914	95432807	chr5:89826914:95432807	chr5	93734806	93741637	ENSG00000248483.5	POU5F2	-	protein_coding	TRUE	0.0061238272364079185	51885.8	159027	1.22451e+08
chr5	89826914	95432807	chr5:89826914:95432807	chr5	93860669	93863825	ENSG00000251023.1	RP11-549J18.1	-	sense_intronic	TRUE	0.14607984652088188	3.05674e-38	4.00773e-36	7.21391e-35
chr5	89826914	95432807	chr5:89826914:95432807	chr5	94568929	94569470	ENSG00000254132.1	MTND6P3	-	processed_pseudogene	TRUE	-0.011357656877536175	0.2548991895686714	0.3199798337138641	1.0
chr5	89826914	95432807	chr5:89826914:95432807	chr5	94825961	94826694	ENSG00000243806.1	RPL7P18	-	processed_pseudogene	TRUE	0.02117429095884814	5.73747e+10	0.00010919710139890477	0.013540440573464192
chr5	89826914	95432807	chr5:89826914:95432807	chr5	94877599	94877777	ENSG00000276514.1	uc_338	-	misc_RNA	TRUE	0.0012903802297247967	2.68824e-19	1.9225e-17	6.34425e-18
chr5	89826914	95432807	chr5:89826914:95432807	chr5	90392261	90409786	ENSG00000153140.7	CETN3	-	protein_coding	TRUE	-0.13257347878494868	3.54153e-77	1.393e-74	8.35802e-75
chr5	89826914	95432807	chr5:89826914:95432807	chr5	90458203	90474768	ENSG00000176055.9	MBLAC2	-	protein_coding	TRUE	-0.2807043515021888	1.11557e-57	2.63275e-57	2.63275e-56
chr5	89826914	95432807	chr5:89826914:95432807	chr5	90515611	90529584	ENSG00000176018.11	LYSMD3	-	protein_coding	TRUE	-0.13598199073852907	4.33941e-93	2.0482e-90	1.0241e-89
chr5	89826914	95432807	chr5:89826914:95432807	chr5	91303029	91314402	ENSG00000248323.4	LUCAT1	-	lincRNA	TRUE	0.04473621024022507	0.011048065991078547	0.016502174518319854	1.0
chr5	89826914	95432807	chr5:89826914:95432807	chr5	91368724	91383359	ENSG00000113369.7	ARRDC3	-	protein_coding	TRUE	-0.07650858307762107	1.31054e-24	1.06651e-23	3.09287e-22
chr5	89826914	95432807	chr5:89826914:95432807	chr5	92675956	92688254	ENSG00000249984.1	CTC-529L17.2	-	lincRNA	TRUE	0.002022772228780455	0.03946316350772123	0.05576830292109108	1.0
chr5	89826914	95432807	chr5:89826914:95432807	chr5	94611906	94618122	ENSG00000270133.1	CTC-303L1.2	-	sense_intronic	TRUE	0.13166417697744637	3.28017e+06	967651	7.74121e+07
chr5	89826914	95432807	chr5:89826914:95432807	chr5	92410256	92660863	ENSG00000249776.4	RP11-133F8.2	-	lincRNA	TRUE	0.02777185551902975	1.0186e+09	2.47825e+08	2.4039e+11
chr5	89826914	95432807	chr5:89826914:95432807	chr5	92907180	92939591	ENSG00000248528.1	CTC-458G6.2	-	lincRNA	TRUE	-0.00328313988085285	8.07472e+09	1.64279e+11	0.0019056341548345183
chr5	89826914	95432807	chr5:89826914:95432807	chr5	93019663	93068669	ENSG00000251361.1	CTD-2091N23.1	-	lincRNA	TRUE	0.013676386821306324	0.0008139960453204468	0.0013433780887805973	0.19210306669562546
chr5	89826914	95432807	chr5:89826914:95432807	chr5	93409359	93585648	ENSG00000237187.7	NR2F1-AS1	-	antisense	TRUE	-0.4284049933158007	0.276329	1.30427	6.52137
chr5	89826914	95432807	chr5:89826914:95432807	chr5	93618069	94111699	ENSG00000113391.15	FAM172A	-	protein_coding	TRUE	-0.11974225783883276	5.53005e-54	1.08758e-51	1.30509e-50
chr5	89826914	95432807	chr5:89826914:95432807	chr5	94703741	95284575	ENSG00000175471.18	MCTP1	-	protein_coding	TRUE	-0.47169114953397157	3.01139e+06	8.56251e+06	7.10689e+08
chr5	89826914	95432807	chr5:89826914:95432807	chr5	90158339	90290071	ENSG00000248555.5	LINC01339	-	processed_transcript	TRUE	0.0013835819305049986	1.18793e-08	6.5198e-09	2.80351e-07
chr5	89826914	95432807	chr5:89826914:95432807	chr5	94152966	94618604	ENSG00000185261.12	KIAA0825	-	protein_coding	TRUE	0.14787569048908822	4.32253e-25	3.64327e-24	1.02012e-22
chr6	29131104	29193658	chr6:29131104:29193658	chr6	29173303	29174574	ENSG00000204700.4	OR2J2	+	protein_coding	TRUE	-0.0002004671079225766	0.011006952179590688	0.016502174518319854	1.0
chr6	29131104	29193658	chr6:29131104:29193658	chr6	29181510	29182445	ENSG00000224233.1	OR2J4P	+	unprocessed_pseudogene	TRUE	-0.000127414520993391	1.85196e+06	5.33003e+07	4.37062e+08
chr6	29131104	29193658	chr6:29131104:29193658	chr6	29137880	29138816	ENSG00000203492.3	OR2N1P	-	unprocessed_pseudogene	TRUE	0.0032047279788341952	0.0168832155145928	0.02490274288402438	1.0
chr6	31349570	31498018	chr6:31349570:31498018	chr6	31356647	31357637	ENSG00000271581.1	XXbac-BPG248L24.12	+	unprocessed_pseudogene	TRUE	-0.16282641217549854	2.79772e+08	7.09959e+07	6.60262e+09
chr6	31349570	31498018	chr6:31349570:31498018	chr6	31370134	31370240	ENSG00000201658.1	RNU6-283P	+	snRNA	TRUE	0.0	1.0	1.0	1.0
chr6	31349570	31498018	chr6:31349570:31498018	chr6	31377419	31378019	ENSG00000230994.1	FGFR3P1	+	processed_pseudogene	TRUE	-9.04911e+08	0.9248409556120397	0.9966322626686821	1.0
chr6	31349570	31498018	chr6:31349570:31498018	chr6	31380411	31380839	ENSG00000223702.1	ZDHHC20P2	+	processed_pseudogene	TRUE	0.0005113203871032282	4.62273e+10	8.86962e+10	0.010909634284132323
chr6	31349570	31498018	chr6:31349570:31498018	chr6	31441667	31446973	ENSG00000230174.1	LINC01149	+	lincRNA	TRUE	-9.14453e+10	0.8045676003380425	0.8831532729292002	1.0
chr6	31349570	31498018	chr6:31349570:31498018	chr6	31399784	31415315	ENSG00000204520.11	MICA	+	protein_coding	TRUE	-0.11223510286839058	1.13065e-32	1.33417e-31	2.66834e-30
chr6	31349570	31498018	chr6:31349570:31498018	chr6	31494881	31511124	ENSG00000204516.8	MICB	+	protein_coding	TRUE	-0.11748480944624204	7.09971e+10	0.00013404249650635146	0.01675531206329393
chr6	31349570	31498018	chr6:31349570:31498018	chr6	31400702	31477506	ENSG00000206337.9	HCP5	+	sense_overlapping	TRUE	-0.09254447761832081	293.786	115.556	6933.35
chr6	31349570	31498018	chr6:31349570:31498018	chr6	31353872	31357188	ENSG00000234745.8	HLA-B	-	protein_coding	TRUE	-0.021337818355412402	8.27246e+08	1.89544e+08	0.00019523003226778918
chr6	31349570	31498018	chr6:31349570:31498018	chr6	31355224	31355316	ENSG00000277402.1	MIR6891	-	miRNA	TRUE	0.005522747955789012	0.32733122524744207	0.3961547136328017	1.0
chr6	31349570	31498018	chr6:31349570:31498018	chr6	31366352	31366898	ENSG00000228432.1	DHFRP2	-	processed_pseudogene	TRUE	0.0014990678459277085	0.21985871754935316	0.2819927029437356	1.0
chr6	31349570	31498018	chr6:31349570:31498018	chr6	31374318	31374403	ENSG00000265294.1	AL671883.1	-	miRNA	TRUE	8.67137e+10	0.5910099952397083	0.6705690330604382	1.0
chr6	31349570	31498018	chr6:31349570:31498018	chr6	31382074	31382288	ENSG00000225851.1	HLA-S	-	unprocessed_pseudogene	TRUE	0.000584346424091336	0.9959681134287943	1.0	1.0
chr6	31349570	31498018	chr6:31349570:31498018	chr6	31394289	31395495	ENSG00000272221.1	XXbac-BPG181B23.7	-	lincRNA	TRUE	-0.28001905731080373	3.02567e-08	1.62286e-08	7.14059e-07
chr6	31349570	31498018	chr6:31349570:31498018	chr6	31402152	31402250	ENSG00000199332.1	Y_RNA	-	misc_RNA	TRUE	-0.31272923199663544	0.005685964848651845	0.0088866735382903	1.0
chr6	31349570	31498018	chr6:31349570:31498018	chr6	31462728	31463336	ENSG00000233902.1	XXbac-BPG181B23.6	-	unprocessed_pseudogene	TRUE	0.013534887672776818	0.00017930643142607272	0.0003181678031319786	0.042316317816553164
chr6	31349570	31498018	chr6:31349570:31498018	chr6	31496689	31496790	ENSG00000201680.1	Y_RNA	-	misc_RNA	TRUE	0.006650699248121136	4.18495e+09	8.97862e+09	0.0009876481187023017
chr6	31349570	31498018	chr6:31349570:31498018	chr6	31268749	31357158	ENSG00000204525.13	HLA-C	-	protein_coding	TRUE	-0.033821656466349694	0.00266748	0.131151	0.629526
chr6	35506021	35742903	chr6:35506021:35742903	chr6	35544632	35545669	ENSG00000228559.1	RP3-340B19.3	+	lincRNA	TRUE	0.041624315029860144	0.018470635539486996	0.02707496886533498	1.0
chr6	35506021	35742903	chr6:35506021:35742903	chr6	35555873	35556264	ENSG00000219023.1	RP3-340B19.2	+	processed_pseudogene	TRUE	0.16861898134526898	0.10331914079968875	0.138541575163219	1.0
chr6	35506021	35742903	chr6:35506021:35742903	chr6	35607628	35607934	ENSG00000218749.1	RP3-340B19.5	+	processed_pseudogene	TRUE	-0.008752709081898496	0.04519877401658826	0.062379594549209536	1.0
chr6	35506021	35742903	chr6:35506021:35742903	chr6	35651818	35651945	ENSG00000212579.1	SNORA40	+	snoRNA	TRUE	-0.0004454057770721486	0.929382862326747	0.9969743432232377	1.0
chr6	35506021	35742903	chr6:35506021:35742903	chr6	35737032	35749079	ENSG00000157343.7	ARMC12	+	protein_coding	TRUE	0.022098129653807343	0.5632523808539424	0.6421621346933836	1.0
chr6	35506021	35742903	chr6:35506021:35742903	chr6	35664717	35664789	ENSG00000265527.1	MIR5690	-	miRNA	TRUE	0.0024357064304945755	0.8650597194845631	0.9364866687998022	1.0
chr6	35506021	35742903	chr6:35506021:35742903	chr6	35701003	35701138	ENSG00000223063.1	AL157823.1	-	miRNA	TRUE	-0.0031654827018381586	0.249873	105.303	589.699
chr6	35506021	35742903	chr6:35506021:35742903	chr6	35733867	35736947	ENSG00000232909.1	RP3-510O8.4	-	antisense	TRUE	0.0022210723408659	0.8634163847097096	0.9364866687998022	1.0
chr6	35506021	35742903	chr6:35506021:35742903	chr6	35497874	35512938	ENSG00000112041.11	TULP1	-	protein_coding	TRUE	0.026336935380973054	0.0077769073891708045	0.011840968669963288	1.0
chr6	35506021	35742903	chr6:35506021:35742903	chr6	35573585	35728583	ENSG00000096060.13	FKBP5	-	protein_coding	TRUE	-0.06193102244706109	7.42206e+10	0.00013792165434659207	0.017516050102017195
chr6	161755991	162812648	chr6:161755991:162812648	chr6	162568379	162569728	ENSG00000227913.1	KRT8P44	+	processed_pseudogene	TRUE	0.0009414702075880676	0.5301189118772418	0.611627169133102	1.0
chr6	161755991	162812648	chr6:161755991:162812648	chr6	162727132	163315492	ENSG00000112530.10	PACRG	+	protein_coding	TRUE	0.4885278932432504	2.76717e+08	7.0984e+07	6.53053e+09
chr6	161755991	162812648	chr6:161755991:162812648	chr6	162500242	162500335	ENSG00000280685.1	AP000887.1	-	miRNA	TRUE	0.005467469501156043	1.75067e+09	4.2159e+09	4.13158e+10
chr6	161755991	162812648	chr6:161755991:162812648	chr6	161347420	162727771	ENSG00000185345.17	PARK2	-	protein_coding	TRUE	0.21525111602004648	0.0005041929614002235	0.0008622430354380635	0.11898953889045275
chr6	163083863	163180316	chr6:163083863:163180316	chr6	162727132	163315492	ENSG00000112530.10	PACRG	+	protein_coding	FALSE	0.6831804299415885	1301.44	495.386	3071.39
chr6	163083863	163180316	chr6:163083863:163180316	chr6	163165414	163192002	ENSG00000225683.4	RP1-301L19.1	-	antisense	FALSE	0.0006342451788596569	0.0006511753231827327	0.0010822350441628515	0.1536773762711249
chr7	110926913	111266739	chr7:110926913:111266739	chr7	111091006	111125454	ENSG00000173114.11	LRRN3	+	protein_coding	TRUE	-0.02870848897176236	0.6821714874899683	0.7593984483378892	1.0
chr7	110926913	111266739	chr7:110926913:111266739	chr7	110663051	111562517	ENSG00000184903.8	IMMP2L	-	protein_coding	FALSE	-0.3122163445641352	6.56029e-115	3.87057e-112	1.54823e-111
chr7	112304328	112320045	chr7:112304328:112320045	chr7	112206588	112343096	ENSG00000198839.8	ZNF277	+	protein_coding	FALSE	-0.2169446582517873	2.7788e-157	3.27899e-156	6.55797e-156
chr7	130901853	130942499	chr7:130901853:130942499	chr7	130936464	130939661	ENSG00000273319.1	RP11-138A9.2	+	lincRNA	TRUE	-0.009308790432593582	0.29638998650938164	0.3605568908052271	1.0
chr7	130901853	130942499	chr7:130901853:130942499	chr7	130853720	130928649	ENSG00000233559.1	AC016831.7	+	lincRNA	FALSE	0.14018603795057333	0.00021452453495227438	0.0003750206685091611	0.05062779024873675
chr7	130901853	130942499	chr7:130901853:130942499	chr7	130930209	130932206	ENSG00000271204.1	RP11-138A9.1	-	lincRNA	TRUE	-0.010938603838782557	0.11421314127563088	0.15228418836750784	1.0
chr7	130901853	130942499	chr7:130901853:130942499	chr7	130876809	130913310	ENSG00000226380.6	AC058791.1	-	lincRNA	TRUE	0.1346568735495967	9.75367e+08	1.95073e+10	0.00230186728922731
chr7	130901853	130942499	chr7:130901853:130942499	chr7	130941760	131110176	ENSG00000231721.5	LINC-PINT	-	antisense	FALSE	-2.03361e+16	0.0	0.0	0.0
chr7	146441759	146460484	chr7:146441759:146460484	chr7	146116002	148420998	ENSG00000174469.16	CNTNAP2	+	protein_coding	FALSE	-0.19937988967477593	0.018658622663071184	0.027181697212869137	1.0
chr9	95096910	95146749	chr9:95096910:95146749	chr9	95113708	95114461	ENSG00000229065.1	RP11-80I15.4	+	antisense	TRUE	0.045661696066271115	510305	1.48682e+07	1.20432e+09
chr9	95096910	95146749	chr9:95096910:95146749	chr9	95123521	95123868	ENSG00000223849.1	RP11-80I15.1	+	processed_pseudogene	TRUE	0.29789331865505586	2.67806e+11	5.22333e+10	0.006320231507741762
chr9	95096910	95146749	chr9:95096910:95146749	chr9	95142449	95142541	ENSG00000251884.1	RNA5SP288	-	rRNA	TRUE	-0.010028681063676128	7.17405e+10	1.48516e+11	0.00169307677641115
chr9	95096910	95146749	chr9:95096910:95146749	chr9	95099054	95317709	ENSG00000158169.10	FANCC	-	protein_coding	FALSE	-0.3353243565501307	3.20222e-125	2.51908e-122	7.55723e-123
chr9	114668244	115590114	chr9:114668244:115590114	chr9	114845594	114848585	ENSG00000229817.1	RP11-78H18.2	+	processed_pseudogene	TRUE	-0.00047486685209581096	0.33829325401465093	0.40733269360947766	1.0
chr9	114668244	115590114	chr9:114668244:115590114	chr9	115141818	115402644	ENSG00000173077.13	2001-12-01	+	protein_coding	TRUE	0.007763453760365875	0.003014090718432574	0.004773996037248909	0.7113254095500875
chr9	114668244	115590114	chr9:114668244:115590114	chr9	114695922	114696315	ENSG00000230284.1	RP11-402G3.4	-	processed_pseudogene	TRUE	0.0007001482996852035	0.7796568018423048	0.8598084356765604	1.0
chr9	114668244	115590114	chr9:114668244:115590114	chr9	114774319	114774407	ENSG00000263546.2	AL390240.1	-	miRNA	TRUE	0.0	1.0	1.0	1.0
chr9	114668244	115590114	chr9:114668244:115590114	chr9	114774737	114775120	ENSG00000274919.1	RP11-428F18.2	-	processed_pseudogene	TRUE	-8.53142e+10	6.99141e+07	1.73681e+08	1.64997e+11
chr9	114668244	115590114	chr9:114668244:115590114	chr9	115252538	115254251	ENSG00000234692.1	RP11-445L6.3	-	lincRNA	TRUE	0.063117015070915	1.35595e+10	3.04766e+09	0.00032000461229073486
chr9	114668244	115590114	chr9:114668244:115590114	chr9	114666434	114682089	ENSG00000230601.4	RP11-402G3.3	-	lincRNA	TRUE	0.03523909290527684	0.0645618	0.287483	15.2366
chr9	114668244	115590114	chr9:114668244:115590114	chr9	114784635	114806126	ENSG00000181634.7	TNFSF15	-	protein_coding	TRUE	-0.4562279825469749	399310	1.25927e+06	9.42372e+06
chr9	114668244	115590114	chr9:114668244:115590114	chr9	114893343	114930595	ENSG00000106952.6	TNFSF8	-	protein_coding	TRUE	-0.362496538451051	6.04466e+09	1.26242e+11	0.0014265395321652516
chr9	114668244	115590114	chr9:114668244:115590114	chr9	115119539	115138409	ENSG00000236461.1	RP11-523L1.2	-	lincRNA	TRUE	0.001195370254566594	8.96023e+09	1.80736e+11	0.002114613469569099
chr9	114668244	115590114	chr9:114668244:115590114	chr9	115019578	115118257	ENSG00000041982.13	TNC	-	protein_coding	TRUE	-0.12545048117005625	0.444039	0.205477	104.793
chr11	83521489	84858616	chr11:83521489:84858616	chr11	84229560	84229649	ENSG00000264838.1	AP003305.1	+	miRNA	TRUE	0.0	1.0	1.0	1.0
chr11	83521489	84858616	chr11:83521489:84858616	chr11	84639993	84640565	ENSG00000240174.1	RP11-851M3.1	+	processed_pseudogene	TRUE	-0.002964795775795781	0.0016519067686534957	0.0026520407986545917	0.389849997402225
chr11	83521489	84858616	chr11:83521489:84858616	chr11	83643602	83725390	ENSG00000255311.4	RP11-160H12.2	+	antisense	TRUE	-0.0002584351014112414	0.5225346925066714	0.6074787558205638	1.0
chr11	83521489	84858616	chr11:83521489:84858616	chr11	84720826	84800701	ENSG00000254787.1	CTD-2537O9.1	+	antisense	TRUE	-0.01064461141969932	8.131e-05	0.00426426	0.191892
chr11	83521489	84858616	chr11:83521489:84858616	chr11	83789977	83791578	ENSG00000254629.1	RP11-160H12.3	-	processed_pseudogene	TRUE	-0.0016532516720304691	1.39152e-19	1.02625e-17	3.284e-17
chr11	83521489	84858616	chr11:83521489:84858616	chr11	83814571	83815263	ENSG00000250257.1	LDHAL6DP	-	unprocessed_pseudogene	TRUE	-0.0009893334383629833	5.12642e-14	3.45667e-13	1.20983e-11
chr11	83521489	84858616	chr11:83521489:84858616	chr11	84545131	84546846	ENSG00000254713.2	HNRNPA1P72	-	processed_pseudogene	TRUE	-0.00022754128506331784	0.4200456458789811	0.49814458506251025	1.0
chr11	83521489	84858616	chr11:83521489:84858616	chr11	83455012	85627922	ENSG00000150672.15	DLG2	-	protein_coding	FALSE	0.1368500531031257	3275.92	1207.99	7731.16
chr11	114141437	114172082	chr11:114141437:114172082	chr11	114059593	114250676	ENSG00000109906.12	ZBTB16	+	protein_coding	FALSE	-0.4281457600824299	39030	1.25927e+06	9.21108e+06
chr11	115306483	115922057	chr11:115306483:115922057	chr11	115333577	115340262	ENSG00000256972.1	AP000462.3	+	lincRNA	TRUE	-0.016130870090585538	61.0948	24.8593	14418.4
chr11	115306483	115922057	chr11:115306483:115922057	chr11	115396756	115397658	ENSG00000256315.1	AP000462.1	+	processed_transcript	TRUE	-0.002174169900397724	1.89519e+09	4.51783e+08	4.47265e+11
chr11	115306483	115922057	chr11:115306483:115922057	chr11	115578049	115578243	ENSG00000255903.2	RP11-136I14.4	+	processed_pseudogene	TRUE	-0.001728376222582257	9.92584e-14	6.16447e-12	2.3425e-09
chr11	115306483	115922057	chr11:115306483:115922057	chr11	115628065	115629743	ENSG00000255599.1	AP000997.1	+	lincRNA	TRUE	-0.010804497618806233	3.0727e+07	8.63283e+06	7.25157e+08
chr11	115306483	115922057	chr11:115306483:115922057	chr11	115638563	115646962	ENSG00000260254.1	AP000997.2	+	lincRNA	TRUE	-0.0002123997930843745	0.13718477212738714	0.18188542821383913	1.0
chr11	115306483	115922057	chr11:115306483:115922057	chr11	115659168	115661417	ENSG00000279771.1	AP000997.3	+	TEC	TRUE	-0.0012826723741827602	0.15373452055620637	0.2015630380625817	1.0
chr11	115306483	115922057	chr11:115306483:115922057	chr11	115363629	115377931	ENSG00000255580.1	AP000462.2	+	lincRNA	TRUE	-0.003061102895040876	0.000852371439531015	0.0013969420814536077	0.20115965972931954
chr11	115306483	115922057	chr11:115306483:115922057	chr11	115582297	115600339	ENSG00000255689.1	RP11-136I14.5	+	lincRNA	TRUE	-0.02576352277611326	3.42068e+08	8.0728e+08	8.0728e+10
chr11	115306483	115922057	chr11:115306483:115922057	chr11	115659658	115843146	ENSG00000256717.1	AP000797.3	+	lincRNA	TRUE	-0.0014179246472793932	7.64256e+10	0.00013981735184282176	0.018036438387724008
chr11	115306483	115922057	chr11:115306483:115922057	chr11	115532322	115532953	ENSG00000256281.1	RP11-136I14.2	-	lincRNA	TRUE	-4.89279e+10	0.24493961453591184	0.30912165256938606	1.0
chr11	115306483	115922057	chr11:115306483:115922057	chr11	115538869	115539384	ENSG00000257087.1	RP11-136I14.3	-	processed_pseudogene	TRUE	-0.0017964967071001955	0.020653155304522847	0.02990272792556682	1.0
chr11	115306483	115922057	chr11:115306483:115922057	chr11	115627082	115627185	ENSG00000239153.1	snoU13	-	snoRNA	TRUE	-0.0040836635765935814	3.6319e-40	5.35705e-40	8.57127e-39
chr11	115306483	115922057	chr11:115306483:115922057	chr11	115731942	115734742	ENSG00000279818.1	CTC-774J1.1	-	TEC	TRUE	-0.0005733242082208631	35686.4	122058	842200
chr11	115306483	115922057	chr11:115306483:115922057	chr11	115754248	115760627	ENSG00000246100.3	LINC00900	-	lincRNA	TRUE	0.24151712783813423	46011.7	1.42878e+06	1.08587e+08
chr11	115306483	115922057	chr11:115306483:115922057	chr11	115169218	115504957	ENSG00000182985.15	CADM1	-	protein_coding	TRUE	-0.2576328707366336	2.02702e-31	2.07989e-31	4.78376e-31
chr16	78046463	78104193	chr16:78046463:78104193	chr16	78022515	78066761	ENSG00000166509.9	CLEC3A	+	protein_coding	FALSE	0.0016456855559135695	0.45582702822156784	0.53787589330145	1.0
chr16	78046463	78104193	chr16:78046463:78104193	chr16	78099413	79212667	ENSG00000186153.15	WWOX	+	protein_coding	TRUE	-0.21469393810938128	1.10367e-73	3.25582e-73	2.60466e-72
chr16	78046463	78104193	chr16:78046463:78104193	chr16	78048483	78049897	ENSG00000260731.1	KRT8P22	-	processed_pseudogene	TRUE	-0.004541076794462121	0.015431482864917847	0.02290459091899756	1.0
chr16	78046463	78104193	chr16:78046463:78104193	chr16	78055824	78056927	ENSG00000261776.1	RP11-358L22.2	-	processed_pseudogene	TRUE	-0.00035303941800802216	0.2940556609449344	0.3605568908052271	1.0
chr16	78046463	78104193	chr16:78046463:78104193	chr16	78014683	78059454	ENSG00000261540.1	RP11-281J9.2	-	antisense	TRUE	0.0021102580258992344	1.73726e-74	4.55549e-74	4.09994e-71
chr16	78149716	78175766	chr16:78149716:78175766	chr16	78099413	79212667	ENSG00000186153.15	WWOX	+	protein_coding	FALSE	-0.21521451416957094	9.93294e-76	3.34882e-74	2.34417e-72
chr16	78149716	78175766	chr16:78149716:78175766	chr16	78166717	78168514	ENSG00000279991.1	RP11-190D6.1	-	TEC	TRUE	0.0007935988412431004	0.22498444012839236	0.28546412833494944	1.0
chr16	78229143	79174964	chr16:78229143:79174964	chr16	78355529	78355834	ENSG00000260014.1	LSM3P5	+	processed_pseudogene	TRUE	0.00439485396494797	0.0008936705942434492	0.0014545259326996828	0.210906260241454
chr16	78229143	79174964	chr16:78229143:79174964	chr16	78534374	78535648	ENSG00000261837.1	RP11-264L1.3	+	sense_intronic	TRUE	0.00983592872578234	8.14016e+10	0.0001477752393529034	0.019210781115877443
chr16	78229143	79174964	chr16:78229143:79174964	chr16	78825281	78826006	ENSG00000243101.1	RPS3P7	+	processed_pseudogene	TRUE	0.0024105885464409654	0.5350083055955479	0.6129221365075209	1.0
chr16	78229143	79174964	chr16:78229143:79174964	chr16	78872739	78873505	ENSG00000280115.1	RP11-133M8.3	+	TEC	TRUE	0.0040050577902099585	2.04643e+08	5.30723e+08	4.82958e+09
chr16	78229143	79174964	chr16:78229143:79174964	chr16	78890231	78892302	ENSG00000280190.1	RP11-319G9.1	+	TEC	TRUE	0.005154697141746802	133581	444016	3.15251e+07
chr16	78229143	79174964	chr16:78229143:79174964	chr16	78895361	78899644	ENSG00000260816.2	RP11-319G9.3	+	sense_intronic	TRUE	0.025191245087657743	1.19714e+08	3.17444e+07	2.82525e+10
chr16	78229143	79174964	chr16:78229143:79174964	chr16	79016136	79017429	ENSG00000280274.1	RP11-556H2.1	+	TEC	TRUE	0.008928859035511624	0.00020709260206371524	0.0003647302543808716	0.048873854087036796
chr16	78229143	79174964	chr16:78229143:79174964	chr16	79090050	79101754	ENSG00000260479.1	RP11-556H2.3	+	sense_intronic	TRUE	0.005177600540946235	0.00631684108352601	0.009807726945474595	1.0
chr16	78229143	79174964	chr16:78229143:79174964	chr16	79105957	79110882	ENSG00000260511.1	RP11-556H2.2	+	sense_intronic	TRUE	-0.0015665542478868974	0.026009332291319225	0.037428063541166685	1.0
chr16	78229143	79174964	chr16:78229143:79174964	chr16	78994345	79004730	ENSG00000261537.1	RP11-319G9.5	+	sense_intronic	TRUE	0.00453650975943518	0.17373040493164693	0.22527678881246524	1.0
chr16	78229143	79174964	chr16:78229143:79174964	chr16	78099413	79212667	ENSG00000186153.15	WWOX	+	protein_coding	FALSE	-0.15777974761283567	4.1106e-36	5.10579e-35	9.70101e-35
chr16	78229143	79174964	chr16:78229143:79174964	chr16	78237362	78241218	ENSG00000260969.1	RP11-190D6.2	-	antisense	TRUE	0.006876590496617587	1.06437e+08	2.85445e+08	2.51191e+09
chr16	78229143	79174964	chr16:78229143:79174964	chr16	78495926	78506568	ENSG00000260733.1	RP11-264L1.4	-	antisense	TRUE	0.011210804098118258	2.51312e+10	5.49164e+07	0.0005930970453792901
chr16	78229143	79174964	chr16:78229143:79174964	chr16	78525189	78526535	ENSG00000279887.1	RP11-264L1.1	-	TEC	TRUE	0.004089543253595207	0.002610130051453113	0.004162099271236045	0.6159906921429347
chr16	78229143	79174964	chr16:78229143:79174964	chr16	78550739	78553296	ENSG00000279129.1	RP11-264L1.2	-	TEC	TRUE	0.010493361034693775	2086.4	746.045	492389
chr16	78229143	79174964	chr16:78229143:79174964	chr16	78981722	78981843	ENSG00000279732.1	RP11-319G9.4	-	TEC	TRUE	0.00878595357026483	1.05432e+08	2.85445e+08	2.48819e+10
chr16	78229143	79174964	chr16:78229143:79174964	chr16	79077376	79078234	ENSG00000260694.1	RP11-556H2.4	-	antisense	TRUE	0.0009155342676151507	0.04352452183151253	0.06042227736609975	1.0
chr22	33732996	33772676	chr22:33732996:33772676	chr22	33725014	33750843	ENSG00000224973.4	LARGE-AS1	+	processed_transcript	FALSE	0.01323061494202726	3.92068e-33	4.20582e-31	9.2528e-31
chr22	33732996	33772676	chr22:33732996:33772676	chr22	33162226	33922841	ENSG00000133424.19	LARGE	-	protein_coding	FALSE	-0.27352105018370837	8.24603e-51	1.39005e-47	1.94606e-46
chr3	59763247	60120264	chr3:59763247:60120264	chr3	59749310	61251459	ENSG00000189283.8	FHIT	-	protein_coding	FALSE	-0.21037062358925027	0.00237555	0.00119283	0.0560629
chr4	88827732	89098492	chr4:88827732:89098492	chr4	88725955	89111398	ENSG00000138640.13	FAM13A	-	protein_coding	FALSE	-0.23507230133284743	2.82996e-33	3.18034e-32	6.67871e-30
chr6	161660731	161675169	chr6:161660731:161675169	chr6	161347420	162727771	ENSG00000185345.17	PARK2	-	protein_coding	FALSE	0.2485481362181099	0.000145030624077565	0.0002592971763811011	0.03422722728230534
chr9	111137613	111183650	chr9:111137613:111183650	chr9	111139246	111284836	ENSG00000227531.1	RP11-202G18.1	-	lincRNA	FALSE	0.02928056351198541	0.115403	0.0555817	27.235
chr10	66489541	66754550	chr10:66489541:66754550	chr10	66497277	66497380	ENSG00000274065.1	AC016819.1	-	miRNA	TRUE	0.0	1.0	1.0	1.0
chr10	66489541	66754550	chr10:66489541:66754550	chr10	65912518	67696169	ENSG00000183230.15	CTNNA3	-	protein_coding	FALSE	-0.007107760509316112	0.29538881156990626	0.3605568908052271	1.0
chr11	84982052	85064291	chr11:84982052:85064291	chr11	84997226	84997768	ENSG00000255396.2	AP000857.2	-	processed_pseudogene	TRUE	-0.0009137522448664244	9.37015e-14	5.97664e-13	2.21136e-10
chr11	84982052	85064291	chr11:84982052:85064291	chr11	85020785	85021655	ENSG00000213305.3	HNRNPCP6	-	processed_pseudogene	TRUE	-0.0037074824714588366	0.3664873297524691	0.43904065899280564	1.0
chr11	84982052	85064291	chr11:84982052:85064291	chr11	83455012	85627922	ENSG00000150672.15	DLG2	-	protein_coding	FALSE	0.13539274504928347	108281	365063	2.55544e+07
chr16	79226622	79247650	chr16:79226622:79247650	chr16	79212711	79229453	ENSG00000261722.1	RP11-679B19.2	-	lincRNA	TRUE	0.020137148663739137	765946	2.1019e+07	1.80763e+10
